# Supplementary material for: Chlorogenic acid on the in vitro germination, invasion and intracellular proliferation of Ameson portunus (Microsporidia)
Source: Research Square preprint supplement (doi:10.21203/rs.3.rs-6226867/v1), 2025-04-07
Supplement: Supplementary file 1 [file 3d6f55241c0cf4730083c784.xlsx]

## Sheet: Table S1
Table S1 Primers for the quantitative real-time polymerase chain reaction (qRT-PCR)
Gene ID	Forward primer (5′-3′)	Reverse primer (5′-3′)
RBS1	CTTAAGGTCGTACCAGTCCTTG	CAACATGGCTGTCGGTAAGA
ACOA	ACAAGGTCAGCATCTTCTACAC	CAGGTCGTAGTTCTTGGGATG
AOD	GAATGGGTTCAAGGGTACTAGG	GAGCGAGTGCAAGTGTCTAA
RBS6	GCTGCTCACTAAAGCGTTCT	GCATTCTCAACCAGGAGAAGAG
DPBS	CTAAGCGAGCTTCGGATCTATG	CAAGGAGGATGACGAGATGATG
TSC	GCTCCTTGATCTGCTCCTTT	CCAATGTTGCTGCCATTGATAA
CAP	CTCGAAGAGATGGGCAAACA	GCTTGTGTGGAGGGATGAA
BCP	CACACAGACACACAACCAAAC	CCCTCTCATTCACATGACACA
LA2	TGTTGAGCTTCACTGCCTTC	ATCAGGAGATCGTGGCCTTA
ZFM	ACGAGGTCCAGGTTGATTTG	GTCGAGAGAGTACCACAAACTG

## Sheet: Table S2
TableS2 Statistical results of transcriptome sequencing data
Sample	Clean reads	Clean bases	GC(%)	Q20 (%)	Q30(%)
PZ_1	27034508	8.11G	34.59	98.09	94.85
PZ_2	21761153	6.53G	40.88	98.28	95.45
PZ_3	22143773	6.64G	48.26	98.95	97.03
PO_1	21546701	6.46G	35.95	98.55	96.17
PO_2	20861367	6.26G	38.27	98.23	95.36
PO_3	23496477	7.05G	41.93	98	94.43
PH_1	22523844	6.76G	42.66	98.32	95.52
PH_2	19961914	5.99G	46.57	98.59	96.11
PH_3	18313347	5.49G	34.79	98.15	95.32
Average	21960342	6.58G	40.43	98.35	95.22

## Sheet: Table S3
Table S3 Annotation of unigenes in different gene database
Database	Number of unigenes	Percentage (%)
NR	78098	56.15
NT	81424	58.54
KO	52475	37.73
SwissProt	75562	54.33
PFAM	60960	43.83
GO	59999	43.14
KOG	39444	28.36
Annotated in at least one Database	118726	85.36

## Sheet: Table S4
Table S4 The most enriched pathway terms
Groups	Signaling pathway	Gene number	Background gene number	P-value
PO vs PZ	cAMP signaling pathway	17	668	0.0298
PH vs PZ	cAMP signaling pathway	45	668	0.00327
PO vs PZ	Rap1 signaling pathway	19	597	0.00263
PH vs PZ	Rap1 signaling pathway	39	597	0.00914
PO vs PZ	Ras signaling pathway	17	612	0.0146
PH vs PZ	Ras signaling pathway	38	612	0.0197
